# Supplementary material for: Facile, rapid and efficient isolation of circulating tumor cells using aptamer-targeted magnetic nanoparticles integrated with a microfluidic device
Source: Royal Society of Chemistry journal article supplement (doi:10.1039/d2ra05930d), 2022-01-01
Supplement: d2ra05930d1.pdf [file d2ra05930d1.pdf]

## **Facile, rapid and efficient isolation of circulating tumor cells using aptamer-targeted magnetic nanoparticles integrated with a microfluidic device**

**Laleh Rafiee<sup>a,‡</sup>, Abolghasem Abbasi Kajani<sup>b,‡</sup>, Mohamadmahdi Samandari<sup>a,c</sup>, Masoud Ayatollahi**

**Mehrgardi<sup>d</sup>, Bahare Zarrin<sup>a</sup>, Shaghayegh Haghjoo Javanmard<sup>a,\*</sup>**

<sup>a</sup> Applied Physiology Research Center, Cardiovascular Research Institute, Isfahan University of Medical Sciences, Isfahan, 81746-73461, Iran

<sup>b</sup> Department of Biotechnology, Faculty of Biological Science and Technology, University of Isfahan, Isfahan, 81746-73441, Iran

<sup>c</sup> Department of Biomedical Engineering, University of Connecticut, Farmington, CT 06030, USA

<sup>d</sup> Department of Chemistry, University of Isfahan, Isfahan, 81746-73441, Iran

<sup>‡</sup>These authors contributed equally to this work.

\* Corresponding authors:

- Shaghayegh Haghjoo Javanmard, Email: [sh\\_haghjoo@med.mui.ac.ir](mailto:sh_haghjoo@med.mui.ac.ir)

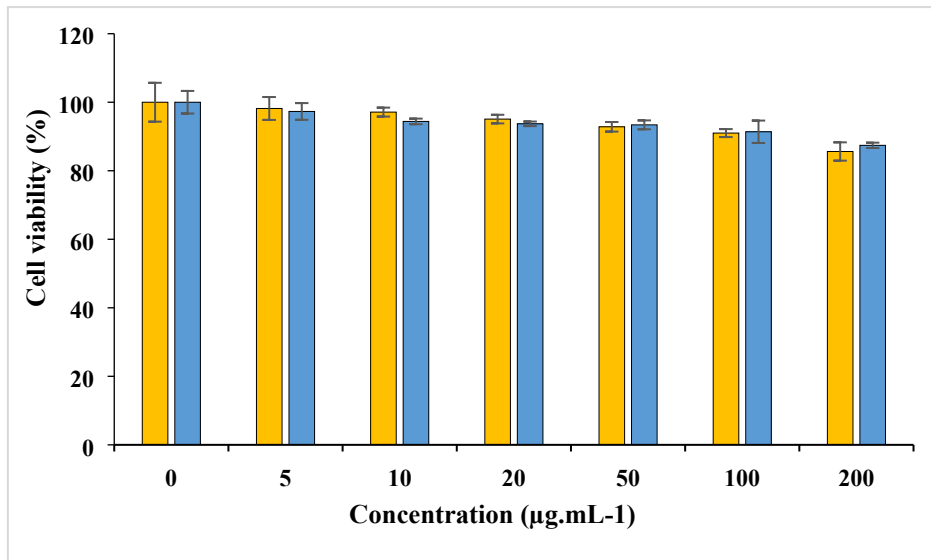

**Fig. S1.** The viability of HUVEC (yellow) and MCF-7 (blue) cells after exposure with different concentrations of MNPs.

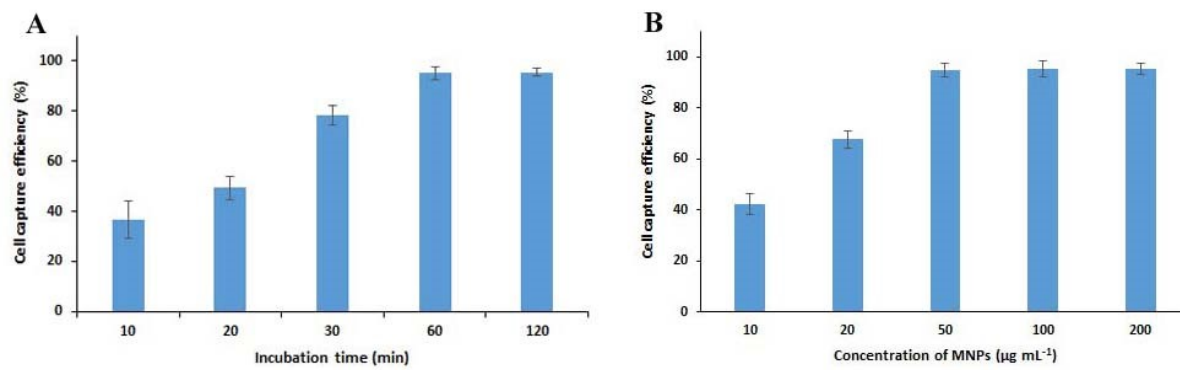

**Fig. S2.** Effect of the incubation time (A) and MNPs concentration (B) on the capture efficiency of MCF-7 cells by using APT-MNPs.

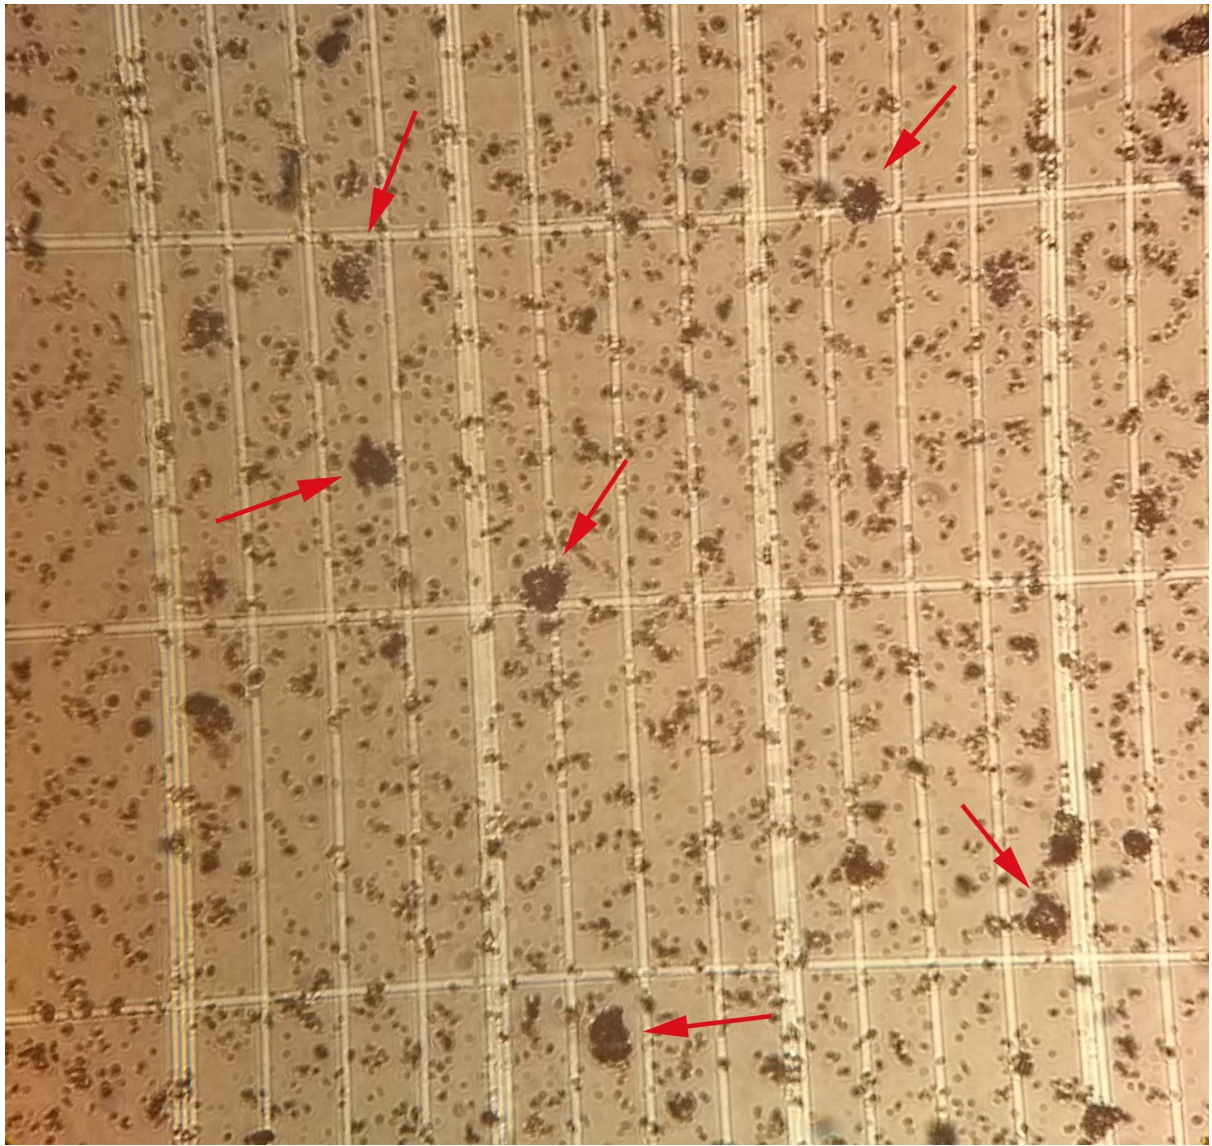

**Fig. S3.** The optical microscope image of captured MCF-7 cancer cells by Apt-MNPs.

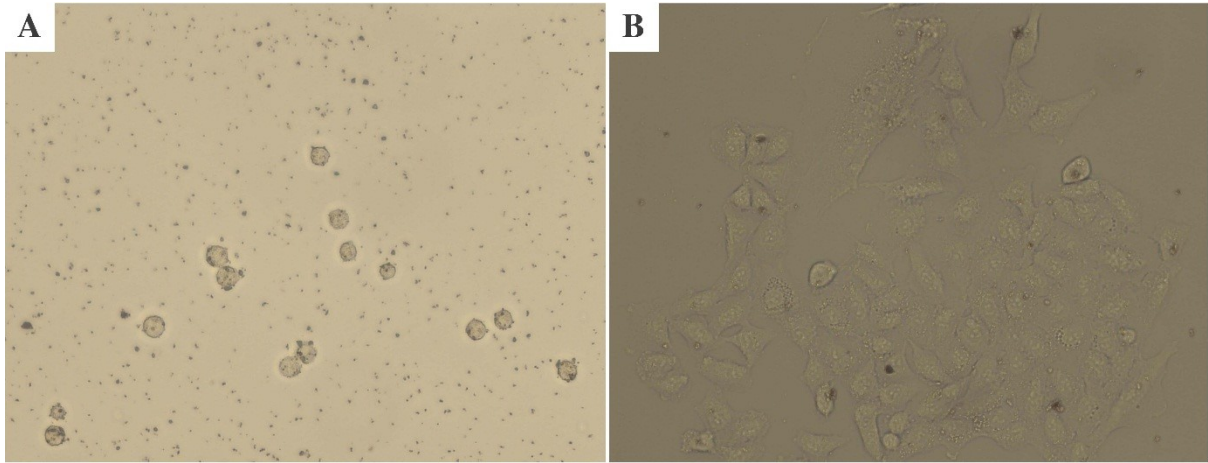

**Fig. S4.** The viability and proliferation of magnetically captured MCF-7 cancer cells. (A) Immediately after capturing and (B) 2 weeks after *in vitro* culture.

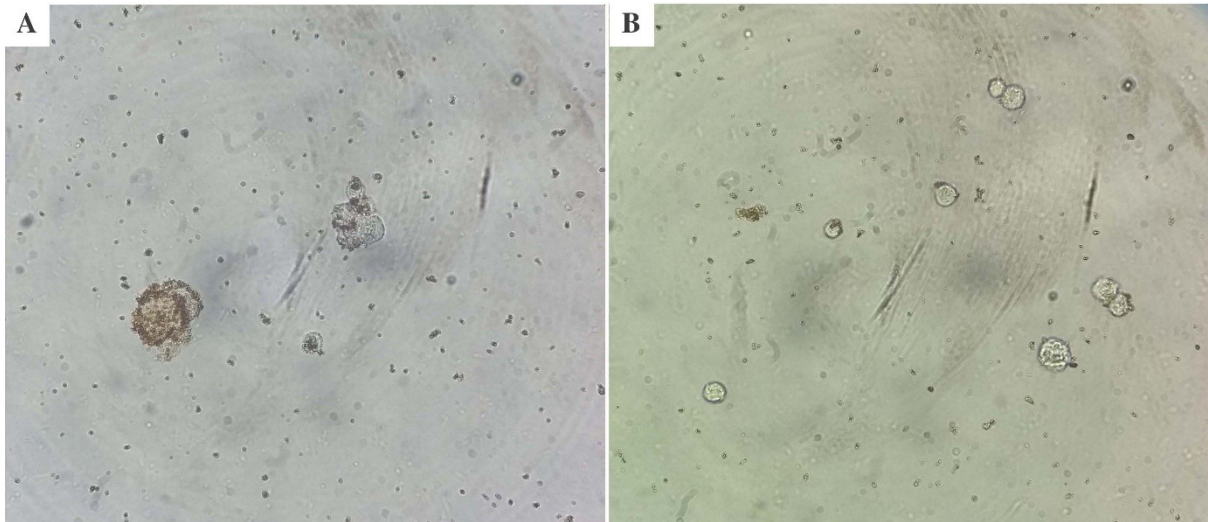

**Fig. S5.** The optical microscope images of magnetically captured cells from the blood samples of breast cancer patient (A) and healthy donor (B).

**Table S1.** The number of isolated CTCs from the peripheral blood samples of breast cancer patients using the APT-MNPs and EasySep™ Kit.

| samples | APT-MNPs | EasySep™ Kit | Stage |
|---------|----------|--------------|-------|
| 1       | 2        | 2            | 4     |
| 2       | 2        | 1            | 4     |
| 3       | 2        | 1            | 4     |
| 4       | 1        | 0            | 4     |
| 5       | 2        | 0            | 4     |
